# Supplementary material for: Micronutrient Status in Pregnant Women after Metabolic Bariatric Surgery in the United Arab Emirates: A Prospective Study
Source: MDPI journal article supplement (doi:10.3390/nu16010072), 2023-12-25
Supplement: s1 [file s1]

Supplement Material

Table S1: The distribution of the pregnant women with MBS and Non-MBS

| Emirates      | Percentage | Number |
|---------------|------------|--------|
| Abu Dhabi     | 48%        | 100    |
| Al Ain        | 15%        | 32     |
| Dubai         | 8%         | 17     |
| Sharjah       | 14%        | 29     |
| Ajman         | 3%         | 6      |
| Fujairah      | 10%        | 21     |
| Ras Al Khaima | 2%         | 4      |
